# Supplementary material
Source: PubMed Central journal article supplement (PMC4657837)
Supplement: ASN.2014100954_ASN2014100954SupplementaryData.pdf [file ASN.2014100954_ASN2014100954SupplementaryData.pdf]

## Supplementary Appendix

Supplement to: Hildebrand AM, Liu K, Shariff SZ et al. Characteristics and outcomes of acute kidney injury treated with dialysis during pregnancy and the postpartum period.

| <b>Index of Contents</b>                              | <b>Page</b> |
|-------------------------------------------------------|-------------|
| Figure S1. Selection of pregnancy cohort .....        | 2           |
| Table S1. Pregnancy characteristics by trimester..... | 3           |
| Table S2. STROBE checklist.....                       | 4           |
| Table S3. Missing data.....                           | 5           |
| Table S4. Databases and coding definitions.....       | 6-10        |

**Figure S1.** Selection of pregnancy cohort, 1997 to 2011 (1,918,789 deliveries)

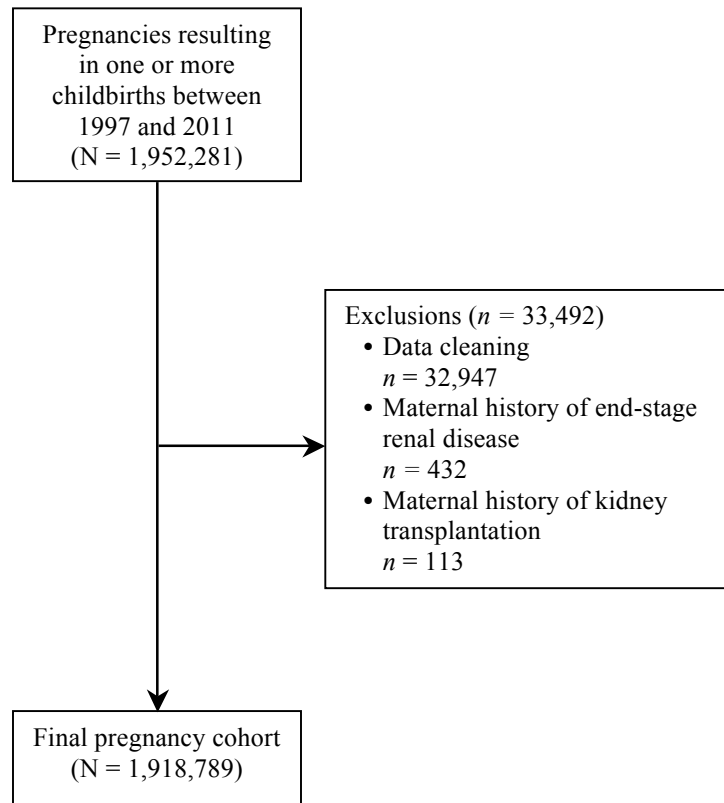

**Table S1.** Complications among pregnancies affected by acute kidney injury according to timing of dialysis initiation.

| Complication, <i>n</i> (%)                    | Timing of initiation of acute dialysis |                     |                     |                   |
|-----------------------------------------------|----------------------------------------|---------------------|---------------------|-------------------|
|                                               | First                                  | Second              | Third               | Post-             |
|                                               | Trimester<br>N = 22                    | Trimester<br>N = 23 | Trimester<br>N = 42 | Partum<br>N = 101 |
| Multifetal gestation                          | 0                                      | 0                   | 0                   | ≤ 5               |
| Caesarean delivery                            | ≤ 5                                    | 6                   | 16                  | ≥ 54              |
| Medical complications *                       |                                        |                     |                     |                   |
| Hyperemesis gravidarum                        | ≤ 5                                    | 0                   | 0                   | ≥ 6               |
| Diabetes mellitus †                           | ≤ 5                                    | ≤ 5                 | ≤ 5                 | 8                 |
| Gestational hypertension                      | 0                                      | ≤ 5                 | 0                   | ≤ 5               |
| Preeclampsia                                  | 0                                      | ≤ 5                 | ≤ 5                 | 34                |
| Thrombotic microangiopathy ‡                  | 0                                      | ≤ 5                 | ≤ 5                 | 23                |
| Pregnancy-related liver disease §             | 0                                      | 0                   | 0                   | ≤ 5               |
| Heart failure                                 | 0                                      | 0                   | ≤ 5                 | ≥ 25              |
| Pyelonephritis                                | 0                                      | 0                   | ≤ 5                 | ≤ 5               |
| Sepsis                                        | 0                                      | ≤ 5                 | ≤ 5                 | 30                |
| Amniotic fluid embolism                       | 0                                      | 0                   | 0                   | ≤ 5               |
| Placenta previa                               | ≤ 5                                    | 0                   | ≤ 5                 | ≤ 5               |
| Placental abruption                           | ≤ 5                                    | ≤ 5                 | ≤ 5                 | ≤ 5               |
| Postpartum hemorrhage                         | ≤ 5                                    | ≤ 5                 | ≤ 5                 | 28                |
| <i>Any of the above medical complications</i> | <i>10</i>                              | <i>8</i>            | <i>24</i>           | <i>88</i>         |

To comply with privacy regulations for minimizing the chance of identification of a study participant, numbers of participants are suppressed in the case of 5 or fewer participants (reported as ≤ 5).

\* Medical complications of pregnancy were ascertained from administrative database codes during pregnancy and the postpartum period.

† Diabetes mellitus includes preexisting type 1 diabetes mellitus, preexisting type 2 diabetes mellitus, and gestational diabetes.

‡ Thrombotic microangiopathy includes HELLP syndrome and thrombotic thrombocytopenic purpura.

§ Pregnancy-related liver diseases includes unspecified liver and biliary diseases in pregnancy.

**Table S2.** Checklist of Recommendations for Reporting of Observational Studies Using the Strengthening the Reporting of Observational Studies in Epidemiology (STROBE) Guidelines

|                            | Item No. | Recommendation                                                                                                                                                                                                                                                                                                                                                                                                 | Reported                                                          |
|----------------------------|----------|----------------------------------------------------------------------------------------------------------------------------------------------------------------------------------------------------------------------------------------------------------------------------------------------------------------------------------------------------------------------------------------------------------------|-------------------------------------------------------------------|
| <b>Title and abstract</b>  | 1        | (a) Indicate the study's design with a commonly used term in the title or the abstract<br>(b) Provide in the abstract an informative and balanced summary of what was done and what was found                                                                                                                                                                                                                  | Title, Abstract<br>Abstract                                       |
| <b>Introduction</b>        |          |                                                                                                                                                                                                                                                                                                                                                                                                                |                                                                   |
| Background / rationale     | 2        | Explain the scientific background and rationale for the investigation being reported                                                                                                                                                                                                                                                                                                                           | Introduction                                                      |
| Objectives                 | 3        | State specific objectives, including any prespecified hypotheses                                                                                                                                                                                                                                                                                                                                               | Introduction                                                      |
| <b>Methods</b>             |          |                                                                                                                                                                                                                                                                                                                                                                                                                |                                                                   |
| Study design               | 4        | Present key elements of study design early in the paper                                                                                                                                                                                                                                                                                                                                                        | Methods                                                           |
| Setting                    | 5        | Describe the setting, locations and relevant dates, including periods of recruitment, exposure, follow-up and data collection                                                                                                                                                                                                                                                                                  | Methods                                                           |
| Participants               | 6        | (a) Give the eligibility criteria, and the sources and methods of selection of participants. Describe methods of follow-up<br>(b) For matched studies, give matching criteria and number of exposed and unexposed                                                                                                                                                                                              | Methods<br>Not applicable                                         |
| Variables                  | 7        | Clearly define all outcomes, exposures, predictors, potential confounders and effect modifiers. Give diagnostic criteria, if applicable                                                                                                                                                                                                                                                                        | Methods                                                           |
| Data sources / measurement | 8        | For each variable of interest, give sources of data and details of methods of assessment (measurement). Describe comparability of assessment methods if there is more than one group                                                                                                                                                                                                                           | Methods,<br>Table S4                                              |
| Bias                       | 9        | Describe any efforts to address potential sources of bias                                                                                                                                                                                                                                                                                                                                                      | Methods                                                           |
| Study size                 | 10       | Explain how the study size was arrived at                                                                                                                                                                                                                                                                                                                                                                      | Methods                                                           |
| Quantitative variables     | 11       | Explain how quantitative variables were handled in the analyses. If applicable, describe which groupings were chosen and why                                                                                                                                                                                                                                                                                   | Methods                                                           |
| Statistical methods        | 12       | (a) Describe all statistical methods, including those used to control for confounding<br>(b) Describe any methods used to examine subgroups and interactions<br>(c) Explain how missing data were addressed<br>(d) If applicable, explain how loss to follow-up was addressed<br>(e) Describe any sensitivity analyses                                                                                         | Methods<br>Methods<br>Methods<br>Not applicable<br>Not applicable |
| <b>Results</b>             |          |                                                                                                                                                                                                                                                                                                                                                                                                                |                                                                   |
| Participants               | 13       | (a) Report numbers of individuals at each stage of study—e.g. numbers potentially eligible, examined for eligibility, confirmed eligible, included in the study, completing follow-up, and analyzed<br>(b) Give reasons for nonparticipation at each stage<br>(c) Consider use of a flow diagram                                                                                                               | Results<br>Results<br>Methods, Figure S1                          |
| Descriptive data           | 14       | (a) Give characteristics of study participants (e.g. demographic, clinical, social) and information on exposures and potential confounders<br>(b) Indicate number of participants with missing data for each variable of interest<br>(c) Summarize follow-up time (e.g. average and total amount)                                                                                                              | Table S3<br>Results<br>Results, Tables 1-2                        |
| Outcome data               | 15       | Report numbers of outcome events or summary measures over time                                                                                                                                                                                                                                                                                                                                                 | Results, Tables 3,4,S1                                            |
| Main results               | 16       | (a) Give unadjusted estimates and, if applicable, confounder-adjusted estimates and their precision (e.g. 95% confidence interval). Make clear which confounders were adjusted for and why they were included<br>(b) Report category boundaries when continuous variables were categorized<br>(c) If relevant, consider translating estimates of relative risk into absolute risk for a meaningful time period | Results, Tables 3-4<br>Results, Tables 1-2<br>Not applicable      |
| Other analyses             | 17       | Report other analyses done—e.g. analyses of subgroups and interactions, and sensitivity analyses                                                                                                                                                                                                                                                                                                               | Not applicable                                                    |
| <b>Discussion</b>          |          |                                                                                                                                                                                                                                                                                                                                                                                                                |                                                                   |
| Key results                | 18       | Summarize key results with reference to study objectives                                                                                                                                                                                                                                                                                                                                                       | Discussion                                                        |
| Limitations                | 19       | Discuss limitations of the study, taking into account sources of potential bias or imprecision. Discuss both direction and magnitude of any potential bias                                                                                                                                                                                                                                                     | Discussion                                                        |
| Interpretation             | 20       | Give a cautious overall interpretation of results considering objectives, limitations, multiplicity of analyses, results from similar studies, and other relevant evidence                                                                                                                                                                                                                                     | Discussion                                                        |
| Generalizability           | 21       | Discuss the generalizability (external validity) of the study results                                                                                                                                                                                                                                                                                                                                          | Discussion                                                        |
| <b>Other Information</b>   |          |                                                                                                                                                                                                                                                                                                                                                                                                                |                                                                   |
| Funding                    | 22       | Give the source of funding and the role of the funders for the present study and, if applicable, for the original study on which the present article is based                                                                                                                                                                                                                                                  | Acknowledgements                                                  |

**Table S3.** Missing data for cohort of 1,918,789 pregnancies resulting in childbirth, 1997 to 2011

| Database | Dates Available               | Dates Required             | Pregnancies Affected                               | Data Affected                                                                                                                                                                           |
|----------|-------------------------------|----------------------------|----------------------------------------------------|-----------------------------------------------------------------------------------------------------------------------------------------------------------------------------------------|
| OHIP     | July 1991 to March 2013       | April 1991 to March 2012   | Childbirths between January 1997 and April 1997    | Selected pre-pregnancy maternal characteristics (chronic kidney disease, thrombotic microangiopathy treated with plasma exchange, nephrology consultation) in all affected pregnancies. |
| ORGD     | January 1990 to December 2009 | January 1997 to March 2012 | Childbirths between January 2010 and December 2011 | Cause of death in all affected pregnancies.                                                                                                                                             |
| ORGD     | January 1990 to March 2011    | January 1997 to March 2012 | Childbirths between April 2011 and December 2011   | Timing of death in all affected pregnancies.                                                                                                                                            |
| RPDB     | April 1990 to March 2013      | January 1997 to March 2012 | Childbirths between January 1997 to March 2012     | Income quintile in 9851 (0.51%) of affected pregnancies.<br>Rural residence in 2488 (0.13%) of affected pregnancies.                                                                    |

Abbreviations: OHIP, Ontario Health Insurance Plan using fee and diagnostic codes; RPDB, Registered Persons Database; ORGD, Ontario Registrar General Death database.

**Table S4.** Healthcare database codes used for definition of exclusion criteria, baseline characteristics, and outcomes measurements.

| Variable *                                                     | Source           | Codes                                                                                                                                                                                                                                                                                                                                                                                                                                                                       |
|----------------------------------------------------------------|------------------|-----------------------------------------------------------------------------------------------------------------------------------------------------------------------------------------------------------------------------------------------------------------------------------------------------------------------------------------------------------------------------------------------------------------------------------------------------------------------------|
| <b>Exclusion Criteria</b>                                      |                  |                                                                                                                                                                                                                                                                                                                                                                                                                                                                             |
| Chronic dialysis                                               | CIHI-DAD<br>OHIP | <b>ICD-9:</b> V451, V560, V568, 36104<br><b>ICD-10:</b> T824, Y602, Y612, Y622, Y841, Z49, Z992, N180, E1022, E1023, E1122, E1123, E1322, E1323, E1422, E1423, V560, V568, 36104<br><b>CCP:</b> 5127, 5142, 5143<br><b>CCI:</b> 1OT53DATS, 1OT53HATS, 1OT53LATS, 1SY55LAFT, 7SC59QD, 1KY76<br><b>OHIP:</b> R850, G324, G336, G327, G862, G865, G099, R825, R826, R827, R833, R840, R841, R843, R848, R851, Z450, Z451, Z452, G864, R852, R853, R854, R885, G333, H540, H740 |
| Kidney transplantation                                         | CIHI-DAD<br>OHIP | <b>ICD-9:</b> V420, 99681<br><b>ICD-10:</b> T861, N165, Z940<br><b>CCP:</b> 6743, 675<br><b>CCI:</b> 1PC85<br><b>OHIP:</b> E762, S435, E769, S434, E771, Z631, G347, G348, G412, G408, G409                                                                                                                                                                                                                                                                                 |
| <b>Maternal Outcomes</b>                                       |                  |                                                                                                                                                                                                                                                                                                                                                                                                                                                                             |
| Acute kidney injury treated with dialysis                      | CIHI-DAD<br>OHIP | <u>Hemodialysis</u><br><b>CCI:</b> 1PZ21HQBR<br><b>CCP:</b> 5195, 6698<br><b>OHIP:</b> R849, G323, G325, G866<br><u>Continuous veno-venous hemodialysis</u><br><b>CCI:</b> 1PZ21HQBS<br><b>OHIP:</b> G082, G083, G085, G090, G091, G092, G093, G095, G294, G295<br><u>Peritoneal dialysis</u><br><b>CCI:</b> 1PZ21HPD4<br><b>OHIP:</b> G330, G331                                                                                                                           |
| Mortality                                                      | RPDB<br>ORGD     | N/A                                                                                                                                                                                                                                                                                                                                                                                                                                                                         |
| Chronic dialysis †                                             | OHIP             | <b>OHIP:</b> R849, G323, G325, G326, G860, G863, G866, G330, G331, G332, G861, G082, G083, G085, G090, G091, G092, G093, G094, G095, G096, G294, G295                                                                                                                                                                                                                                                                                                                       |
| <b>Perinatal Outcomes</b>                                      |                  |                                                                                                                                                                                                                                                                                                                                                                                                                                                                             |
| Low birth weight                                               | MOMBABY          | <b>MOMBABY:</b> [WEIGHT] < 2500g in infant CIHI-DAD record                                                                                                                                                                                                                                                                                                                                                                                                                  |
| Small for gestational age (or intrauterine growth restriction) | CIHI-DAD         | <b>ICD-9:</b> 65650, 65651, 65653, 76400, 76401, 76402, 76403, 76404, 76405, 76406, 76407, 76408, 76409, 76410, 76411, 76412, 76413, 76414, 76415, 76416, 76417, 76418, 76419, 76490, 76491, 76492, 76493, 76494, 76495, 76496, 76497, 76498, 76499<br><b>ICD-10:</b> P0590, P0591, P0599                                                                                                                                                                                   |
| Preterm birth ‡                                                | MOMBABY          | <b>MOMBABY:</b> [B_GESTWKS_DEL] or [M_GESTWKS_DEL] < 37                                                                                                                                                                                                                                                                                                                                                                                                                     |

weeks in infant/maternal CIHI-DAD record  
**ICD-9:** 76500, 76501, 76502, 76503, 76504, 76505, 76506, 76507, 76508, 76509, 76510, 76511, 76512, 76513, 76514, 76515, 76516, 76517, 76518, 76519  
**ICD-10:** P070, P071, P072, P073  
**OHIP:** 765

|                     |         |                                                                                                                                               |
|---------------------|---------|-----------------------------------------------------------------------------------------------------------------------------------------------|
| Stillbirth          | MOMBABY | <b>MOMBABY:</b> [B_STILLBIRTH] or [M_STILLBIRTH] in infant/maternal CIHI-DAD record                                                           |
| Perinatal mortality | MOMBABY | <b>MOMBABY:</b> [DTHDATE] within 7 days of birth in infant RPDB record or [B_STILLBIRTH] or [M_STILLBIRTH] in infant/maternal CIHI-DAD record |
| Neonatal death      | MOMBABY | <b>MOMBABY:</b> [DTHDATE] within 28 days of birth in infant RPDB record                                                                       |

---

### Maternal Demographics

---

|                     |         |                                                         |
|---------------------|---------|---------------------------------------------------------|
| Age                 | RPDB    | N/A                                                     |
| Neighborhood income | RPDB    | N/A                                                     |
| Rural residence     | RPDB    | N/A                                                     |
| Previous pregnancy  | MOMBABY | <b>MOMBABY:</b> [B_BDATE] in the infant CIHI-DAD record |

---

### Maternal Preexisting Medical Conditions

---

|                               |                  |                                                                                                                                                                                                             |
|-------------------------------|------------------|-------------------------------------------------------------------------------------------------------------------------------------------------------------------------------------------------------------|
| Hypertension                  | OHD §            | N/A                                                                                                                                                                                                         |
| Diabetes mellitus             | ODD ¶            | N/A                                                                                                                                                                                                         |
| Chronic kidney disease ¶      | CIHI-DAD<br>OHIP | <b>ICD-9:</b> 4030, 4031, 4039, 4040, 4041, 4049, 582, 583, 580, 581, 584, 585, 586, 587, 5880, 5888, 5889, 5937<br><b>ICD-10:</b> E102, E112, E132, E142, I12, I13, N08, N18, N19<br><b>OHIP:</b> 403, 585 |
| Systemic lupus erythematosus  | CIHI-DAD         | <b>ICD-9:</b> 7100<br><b>ICD-10:</b> M320, M321, M328, M329                                                                                                                                                 |
| Thrombotic microangiopathy ** | CIHI-DAD<br>OHIP | <b>ICD-9:</b> 4466<br><b>ICD-10:</b> M311<br><b>OHIP:</b> 287                                                                                                                                               |
| Plasma exchange **            | OHIP             | <b>OHIP:</b> G272, G277, G278, G290                                                                                                                                                                         |

---

### Health Services Utilization

---

|                                               |      |                                                                   |
|-----------------------------------------------|------|-------------------------------------------------------------------|
| General practitioner/family physician consult | IPDB | N/A                                                               |
| Internal medicine specialist                  | IPDB | N/A                                                               |
| Nephrologist ††                               | OHIP | <b>OHIP:</b> C132, C101, C138, G860, G323, E083, C137, C135, A135 |

|                                    |                  |                                                                                                                                                                                                                                                                                                                                                                                                                                                                                                                                                                                           |
|------------------------------------|------------------|-------------------------------------------------------------------------------------------------------------------------------------------------------------------------------------------------------------------------------------------------------------------------------------------------------------------------------------------------------------------------------------------------------------------------------------------------------------------------------------------------------------------------------------------------------------------------------------------|
| Prenatal visits                    | CIHI-DAD<br>OHIP | <b>ICD-9:</b> V220, V221, V230, V231, V232, V233, V234, V235, V238, V239, V288, V289<br><b>ICD-10:</b> Z34, Z35<br><b>CCP:</b> 02.88<br><b>CCI:</b> 5AB01, 5AB03<br><b>OHIP:</b> P003, P004, P005                                                                                                                                                                                                                                                                                                                                                                                         |
| Ultrasonographic examinations      | OHIP             | <b>OHIP:</b> J128, J135, J138, J157, J158, J159, J160, J162, J428, J435, J438, J457, J458, J459, J460, J462                                                                                                                                                                                                                                                                                                                                                                                                                                                                               |
| Assisted reproductive technologies | CIHI-DAD<br>OHIP | <b>ICD-9:</b> V261, V260, V261, V262, V268, V269<br><b>ICD-10:</b> N980, N981, N982, N983, N988, N989, Z37001, Z37101, Z37201, Z37301, Z37401, Z37501, Z37511, Z37521, Z37531, Z37581, Z37591, Z37601, Z37611, Z37621, Z37631, Z37681, Z37691, Z37701, Z37711, Z37721, Z37731, Z37781, Z37791, Z37901, Z37911, Z38001, Z38011, Z38101, Z38201, Z38301, Z38311, Z38401, Z38501, Z38601, Z38611, Z38621, Z38631, Z38641, Z38651, Z38661, Z38671, Z38681, Z38691, Z38701, Z38801, N982, N983, N988, N989, Z310, Z311, Z312, Z313, Z314, Z318, Z319<br><b>CCP:</b> 81.92<br><b>OHIP:</b> G367 |

---

### Pregnancy Characteristics

---

|                                        |                  |                                                                                                                                                                                                                                                                                                                                                 |
|----------------------------------------|------------------|-------------------------------------------------------------------------------------------------------------------------------------------------------------------------------------------------------------------------------------------------------------------------------------------------------------------------------------------------|
| Multiple gestation                     | MOMBABY          | <b>MOMBABY:</b> [B_MULTIPLE BIRTH] or [M_MULTIPLE BIRTH] in the infant/maternal CIHI-DAD record                                                                                                                                                                                                                                                 |
| Caesarean delivery <sup>††</sup>       | CIHI-DAD         | <b>ICD-9:</b> 66970, 66971<br><b>ICD-10:</b> P034<br><b>CCP:</b> 860, 861, 862<br><b>CCI:</b> 5MD60AA, 5MD60CB, 5MD60CC, 5MD60CD, 5MD60CE, 5MD60CF, 5MD60CG, 5MD60JW, 5MD60JX, 5MD60JY, 5MD60JZ, 5MD60KA, 5MD60KB, 5MD60KC, 5MD60KD, 5MD60KE, 5MD60KF, 5MD60KG, 5MD60KT, 5MD60RA, 5MD60RB, 5MD60RC, 5MD60RD, 5MD60RE, 5MD60RF, 5MD60RG, 5MD60RH |
| Hyperemesis gravidarum                 | CIHI-DAD<br>OHIP | <b>ICD-9:</b> 64300, 64301<br><b>ICD-10:</b> O21001, O21003, O21009, O21101, O21103, O21109<br><b>OHIP:</b> 643                                                                                                                                                                                                                                 |
| Diabetes mellitus                      | CIHI-DAD         | <b>ICD-9:</b> 6480<br><b>ICD-10:</b> O24                                                                                                                                                                                                                                                                                                        |
| Gestational hypertension <sup>§§</sup> | CIHI-DAD         | <b>ICD-9:</b> 64290, 64291, 64292, 64293, 64294<br><b>ICD-10:</b> O13                                                                                                                                                                                                                                                                           |
| Preeclampsia <sup>   </sup>            | CIHI-DAD<br>OHIP | <b>ICD-9:</b> 64240, 64241, 64242, 64243, 64244, 64250, 64251, 64252, 64253, 64254, 64260, 64261, 64262, 64263, 64264, 64270, 64271, 64272, 64273, 64274<br><b>ICD-10:</b> O14, O15<br><b>OHIP:</b> 642                                                                                                                                         |
| Thrombotic microangiopathy             | CIHI-DAD<br>OHIP | <b>ICD-9:</b> 4466<br><b>ICD-10:</b> M311                                                                                                                                                                                                                                                                                                       |



|                                  |                  |                                                                                                                                                                                                                                                                                                                         |
|----------------------------------|------------------|-------------------------------------------------------------------------------------------------------------------------------------------------------------------------------------------------------------------------------------------------------------------------------------------------------------------------|
|                                  |                  | <b>OHIP:</b> 287                                                                                                                                                                                                                                                                                                        |
| Pregnancy-related liver disease  | CIHI-DAD         | <b>ICD-9:</b> 64670, 64671, 64673<br><b>ICD-10:</b> O26601, O26602, O26603, O26604, O26609                                                                                                                                                                                                                              |
| Heart failure                    | CIHI-DAD<br>OHIP | <b>ICD-9:</b> 425, 5184, 428, 514<br><b>ICD-10:</b> I500, I501, I509, I255, J81<br><b>CCP:</b> 4961, 4962, 4963, 4964<br><b>CCI:</b> 1HP53, 1HP55, 1HZ53GRFR, 1HZ53LAFR, 1HZ53SYFR<br><b>OHIP:</b> R701, R702, Z429, 428                                                                                                |
| Pyelonephritis                   | CIHI-DAD<br>OHIP | <b>ICD-9:</b> 59000, 59001, 59010, 59011, 5902, 59080, 59081, 5909<br><b>ICD-10:</b> N110, N111, N151, O23001, O23002, O23003, O23004, O23009<br><b>OHIP:</b> 590                                                                                                                                                       |
| Sepsis                           | CIHI-DAD<br>OHIP | <b>ICD-9:</b> 0031, 0380, 0381, 0382, 0383, 03840, 03841, 03842, 03843, 03844, 03849, 0388, 0389, 0545, 65930, 65931, 65933<br><b>ICD-10:</b> A400, A401, A402, A403, A408, A409, A410, A411, A412, A413, A414, A4150, A4151, A4152, A4158, A4159, A4180, A4188, A419, R572, O85002, O85004, O85009<br><b>OHIP:</b> 038 |
| Amniotic fluid embolism          | CIHI-DAD         | <b>ICD-9:</b> 67310, 67311, 67312, 67313, 67314<br><b>ICD-10:</b> O88101, O88102, O88103, O88104, O88109                                                                                                                                                                                                                |
| Placenta previa                  | CIHI-DAD         | <b>ICD-9:</b> 6410, 6411<br><b>ICD-10:</b> O44                                                                                                                                                                                                                                                                          |
| Placental abruption ¶¶           | CIHI-DAD<br>OHIP | <b>ICD-9:</b> 64120, 64121, 64123<br><b>ICD-10:</b> O45<br><b>OHIP:</b> 641                                                                                                                                                                                                                                             |
| Postpartum hemorrhage ***        | CIHI-DAD<br>OHIP | <b>ICD-9:</b> 66600, 66602, 66604, 66610, 66612, 66614, 66620, 66622, 66624<br><b>ICD-10:</b> O72<br><b>OHIP:</b> 666                                                                                                                                                                                                   |
| Admission to intensive care unit | OHIP             | <b>OHIP:</b> C101, G400, G401, G402, G405, G406, G407, G557, G558, G559                                                                                                                                                                                                                                                 |
| Mechanical ventilation           | OHIP             | <b>OHIP:</b> G405, G406, G407, G557, G558, G559                                                                                                                                                                                                                                                                         |

Abbreviations: CIHI-DAD, Canadian Institute for Health Information Discharge Abstract Database using International Classification of Disease, Ninth Revision (ICD-9) and Tenth Revision (ICD-10), Canadian Classification of Diagnostic, Therapeutic, and Surgical Procedures (CCP), and Classification of Health Interventions (CCI) codes; OHIP, Ontario Health Insurance Plan using fee and diagnostic codes; RPDB, Registered Persons Database; OHD, Ontario Hypertension Database; ODD, Ontario Diabetes Database; N/A, not applicable.

\* Variables are defined by the presence of at least one of the listed codes unless otherwise specified.

† Chronic dialysis dependence was defined by receipt of at least two chronic dialysis codes on two separate days.

‡ ICD-9 and ICD-10 codes were used to define preterm birth when infant data from MOMBABY dataset was missing.

¶ **Validity of preterm birth:** ICD-10 codes P070, P071, P072, and P073 used together have a sensitivity of 91.2% and specificity of 98.8% for identification of preterm delivery as ascertained through chart review by trained personnel.<sup>1</sup>

§ The Ontario Hypertension Database is an ICES-derived database that contains all Ontario hypertension patients defined by a) one hospital admission with a hypertension diagnosis, or b) an OHIP claim with a hypertension diagnosis followed within two years by either an OHIP claim or a hospital admission with a hypertension diagnosis.<sup>2</sup>

|| The Ontario Diabetes Database is an ICES-derived database that contains all Ontario diabetes patients defined by the presence of at least one hospital admission with a diabetes diagnosis or an OHIP claim with a diabetes diagnosis.<sup>3</sup>

¶¶ **Validity of chronic kidney disease:** Chronic kidney disease was defined using an algorithm of hospital diagnosis codes validated for older adults in the study region.<sup>4</sup> This algorithm identified patients with a median estimated glomerular filtration rate of 38 mL/min/1.73 m<sup>2</sup> (interquartile range, 27 to 52 mL/min per 1.73 m<sup>2</sup>), whereas its absence identified patients with a median estimated glomerular filtration rate of 69 mL/min/1.73 m<sup>2</sup> (interquartile range, 56 to 82 mL/min per 1.73 m<sup>2</sup>).<sup>4</sup>

- \*\* The variable ‘thrombotic microangiopathy treated with plasma exchange’ was defined by receipt of plasma exchange that falls within an admission for thrombotic microangiopathy (using CIHI-DAD codes) or within seven days of a diagnosis of thrombotic microangiopathy (using OHIP codes).
- †† Restricted to physicians who also billed at least 50 dialysis codes (one per day) within one year of consultation service date.
- ‡‡ **Validity of caesarean delivery:** ICD-10 code P034 has a sensitivity of 99.8% and a specificity of 98.7% for identification of caesarean delivery as ascertained through chart review by trained personnel.<sup>1</sup>
- §§ **Validity of gestational hypertension:** ICD-10 code O13 has a sensitivity of 10.0-68.2% and specificity of 99.6-99.8% for identification of gestational hypertension as ascertained through chart review by experienced clinicians.<sup>5,6</sup>
- |||| **Validity of preeclampsia:** Coding algorithms have a sensitivity of 66.7-100.0% and a specificity of 64.3-100.0% for identification of preeclampsia as ascertained through chart review by obstetricians or experienced coding specialists using well-described and accepted criteria.<sup>6-9</sup>
- ¶¶ **Validity of placental abruption:** ICD-9 codes 64120, 64121, and 64123 used together have a sensitivity of 89.0% and a positive predictive value of 89.0% for identification of placental abruption as ascertained through chart review by experienced accredited record technicians or certified coding specialists.<sup>9</sup>
- \*\*\* **Validity of postpartum hemorrhage:** ICD-10 code O72 has a sensitivity of 90.2% and a specificity of 98.2% for the identification of postpartum hemorrhage as ascertained through chart review by trained personnel.<sup>1</sup>

## References

1. Joseph KS, Fahey J: Validation of perinatal data in the Discharge Abstract Database of the Canadian Institute for Health Information. *Chronic Dis Can* 29: 96–100, 2009
2. Tu K, Campbell NR, Chen Z-L, Cauch-Dudek KJ, McAlister FA: Accuracy of administrative databases in identifying patients with hypertension. *Open Med* 1: e18–26, 2007
3. Hux JE, Ivis F, Flintoft V, Bica A: Diabetes in Ontario: determination of prevalence and incidence using a validated administrative data algorithm. *Diabetes Care* 25: 512–6, 2002
4. Fleet JL, Dixon SN, Shariff SZ, Quinn RR, Nash DM, Harel Z, Garg AX: Detecting chronic kidney disease in population-based administrative databases using an algorithm of hospital encounter and physician claim codes. *BMC Nephrol* 14: 81, 2013
5. Hadfield RM, Lain SJ, Cameron CA, Bell JC, Morris JM, Roberts CL: The prevalence of maternal medical conditions during pregnancy and a validation of their reporting in hospital discharge data. *Aust N Z J Obstet Gynaecol* 48: 78–82, 2008
6. Klemmensen AK, Olsen SF, Osterdal ML, Tabor A: Validity of preeclampsia-related diagnoses recorded in a national hospital registry and in a postpartum interview of the women. *Am J Epidemiol* 166: 117–24, 2007
7. Geller SE, Ahmed S, Brown ML, Cox SM, Rosenberg D, Kilpatrick SJ: International Classification of Diseases-9th revision coding for preeclampsia: how accurate is it? *Am J Obstet Gynecol* 190: 1629–33, 2004
8. Korst LM, Gregory KD, Gornbein JA: Elective primary caesarean delivery: accuracy of administrative data. *Paediatr Perinat Epidemiol* 18: 112–9, 2004
9. Yasmeeen S, Romano PS, Schembri ME, Keyzer JM, Gilbert WM: Accuracy of obstetric diagnoses and procedures in hospital discharge data. *Am J Obstet Gynecol* 194: 992–1001, 2006
